# Supplementary material
Source: PubMed Central journal article supplement (PMC4252588)
Supplement: NIHMS627819-supplement-4.pdf [file NIHMS627819-supplement-4.pdf]

**Supplemental Figure 1. Multiple sequence alignment of CYP51 from different kingdoms in the region of P355 (*T. cruzi* numbering).**

Multiple sequence alignment of CYP51 from various species. The alignment shows conserved regions in grey and variable regions in black. An arrow points to a specific residue in the sorghum sequence.

|            |      |    |    |    |    |    |     |    |       |       |     |       |       |       |       |       |       |    |       |       |       |       |       |
|------------|------|----|----|----|----|----|-----|----|-------|-------|-----|-------|-------|-------|-------|-------|-------|----|-------|-------|-------|-------|-------|
| sorghum    | : RC | IK | EA | LR | LP | PL | IM  | LL | RQ    | SH    | SDF | TV    | TT    | KE    | GKE   | ----- | : 375 |    |       |       |       |       |       |
| cane       | : RC | IK | EA | LR | LP | PL | IM  | LL | RQ    | SH    | SDF | TV    | TT    | KE    | GKE   | ----- | : 338 |    |       |       |       |       |       |
| corn       | : RC | IK | EA | LR | LP | PL | IM  | LL | RQ    | SH    | SDF | TV    | TT    | KE    | GKV   | ----- | : 375 |    |       |       |       |       |       |
| wheat      | : RC | IK | EA | LR | LP | PL | IM  | LL | RQ    | SH    | SDF | SV    | TT    | RE    | GKE   | ----- | : 375 |    |       |       |       |       |       |
| barley     | : RC | IK | EA | LR | LP | PL | IM  | LL | RQ    | SH    | SDF | SV    | TT    | RE    | GKE   | ----- | : 342 |    |       |       |       |       |       |
| oat        | : RC | IK | EA | LR | LP | PL | IM  | LL | RQ    | SH    | TDF | SV    | TT    | RE    | GKE   | ----- | : 373 |    |       |       |       |       |       |
| rice       | : RC | IK | EA | LR | LP | PL | IM  | LL | RQ    | SH    | NDF | SV    | TT    | KG    | GKE   | ----- | : 371 |    |       |       |       |       |       |
| onion      | : RC | IK | EA | LR | LP | PL | IM  | LL | RH    | SH    | SDF | SV    | RT    | KE    | GVE   | ----- | : 372 |    |       |       |       |       |       |
| A.thaliana | : RC | IK | EA | LR | LP | PL | IM  | LM | RASH  | SDF   | SV  | TARD  | GKT   | ----- | : 374 |       |       |    |       |       |       |       |       |
| rapeseed   | : RC | IK | EA | LR | LP | PL | IM  | LM | RASH  | CDF   | SV  | TARD  | GKT   | ----- | : 372 |       |       |    |       |       |       |       |       |
| potato     | : RC | IK | EA | LR | LP | PL | IM  | LL | RSSH  | SDF   | SV  | TT    | RE    | GKE   | ----- | : 371 |       |    |       |       |       |       |       |
| tomato     | : RC | IK | EA | LR | LP | PL | IM  | LL | RSSH  | SE    | FS  | SV    | TT    | RE    | GKE   | ----- | : 371 |    |       |       |       |       |       |
| tobacco    | : RC | IK | EA | LR | LP | PL | IM  | LL | RSSH  | SDF   | TV  | KT    | RE    | GKE   | ----- | : 371 |       |    |       |       |       |       |       |
| petunia    | : RC | IK | EA | LR | LP | PL | IM  | LL | RSSH  | SDF   | TV  | KT    | RE    | GKE   | ----- | : 372 |       |    |       |       |       |       |       |
| columbine  | : RC | IK | EA | LR | LP | PL | IM  | LL | RSSH  | SE    | FS  | SV    | TT    | RE    | GKE   | ----- | : 378 |    |       |       |       |       |       |
| grape      | : RC | IK | EA | LR | LP | PL | IM  | LL | RSSH  | SDF   | SV  | TT    | KG    | GKE   | ----- | : 370 |       |    |       |       |       |       |       |
| cotton     | : RC | IK | EA | LR | LP | PL | IM  | LL | RSSP  | SDF   | SV  | KT    | RD    | GKE   | ----- | : 380 |       |    |       |       |       |       |       |
| poplar     | : RC | IK | EA | LR | LP | PL | IM  | LL | RSSH  | SDF   | SV  | TT    | RD    | GKE   | ----- | : 363 |       |    |       |       |       |       |       |
| ricinus    | : RC | IK | EA | LR | LP | PL | IM  | LL | RSSH  | SDF   | SV  | KT    | RD    | GKE   | ----- | : 369 |       |    |       |       |       |       |       |
| apple      | : RC | IK | EA | LR | LP | PL | IM  | LL | RSSH  | SDF   | SV  | QT    | RE    | GKE   | ----- | : 373 |       |    |       |       |       |       |       |
| orange     | : RC | IK | EA | LR | LP | PL | IM  | LL | RSSH  | SDF   | TV  | QT    | RE    | GKE   | ----- | : 359 |       |    |       |       |       |       |       |
| soybean    | : RC | IK | EA | LR | LP | PL | IM  | LM | RSSHT | DF    | SV  | TT    | RE    | GKE   | ----- | : 370 |       |    |       |       |       |       |       |
| clover     | : RC | IK | EA | LR | LP | PL | IM  | LL | RSSH  | SDF   | SV  | TT    | RE    | GKE   | ----- | : 372 |       |    |       |       |       |       |       |
| M.truncatu | : RC | IK | EA | LR | LP | PL | IM  | LL | RSSH  | SDF   | SV  | TT    | RE    | GKE   | ----- | : 410 |       |    |       |       |       |       |       |
| lotus      | : RC | IK | EA | LR | LP | PL | IM  | LL | RSSH  | SDF   | SV  | TT    | RE    | GKE   | ----- | : 358 |       |    |       |       |       |       |       |
| pine       | : RC | IK | EA | LR | LP | PL | IV  | LL | RSNH  | RDF   | TV  | TAK   | DG    | KD    | ----- | : 371 |       |    |       |       |       |       |       |
| clementine | : QC | IK | ET | LK | TP | PL | IM  | LL | RAKAD | VEL   | GG  | ----- | : 337 |       |       |       |       |    |       |       |       |       |       |
| spruce     | : NC | IR | EA | LR | MY | PP | LI  | LM | RRLV  | LKD   | VE  | YK    | G     | ----- | : 359 |       |       |    |       |       |       |       |       |
| moss       | : RA | MK | EA | LR | LP | PL | LIL | LL | RQ    | NHT   | DF  | SV    | TT    | RE    | GKS   | ----- | : 363 |    |       |       |       |       |       |
| O.lucimari | : FA | VK | EA | LR | MH | PP | LI  | ML | RA    | QVP   | FE  | VE    | TST   | GK    | K     | ----- | : 358 |    |       |       |       |       |       |
| O.tauri    | : FA | VK | EA | LR | MH | PP | LI  | ML | RYA   | QSA   | FE  | VE    | TTE   | GK    | K     | ----- | : 386 |    |       |       |       |       |       |
| C.reinhard | : RN | IT | EA | LR | MH | PP | LL  | VM | RYAK  | KPF   | SV  | TT    | ST    | GK    | S     | ----- | : 385 |    |       |       |       |       |       |
| r.algae    | : LC | IK | ET | LR | MY | PP | LIL | LM | RK    | ----- | VL  | KPK   | FY    | KE    | ----- | : 389 |       |    |       |       |       |       |       |
| A.euteiche | : AC | IK | ET | LR | LT | PP | LIL | LM | RKVM  | KDIE  | CGD | ----- | : 374 |       |       |       |       |    |       |       |       |       |       |
| D.discoide | : TV | IR | EV | LR | LP | PL | I   | FL | MR    | KVM   | TP  | ME    | YK    | G     | ----- | : 359 |       |    |       |       |       |       |       |
| Rhodococcu | : AV | LK | ET | LR | LP | PL | I   | IL | LR    | VAR   | GE  | FE    | V     | GG    | YR    | ----- | : 338 |    |       |       |       |       |       |
| M.capsulat | : NV | IK | EV | LR | LP | PL | LIL | LM | RKVM  | KDFE  | V   | QG    | MR    | ----- | : 339 |       |       |    |       |       |       |       |       |
| P.pacifica | : AT | IK | EV | LR | MY | PP | I   | IV | VM    | RKV   | VND | FE    | FG    | GY    | R     | ----- | : 353 |    |       |       |       |       |       |
| V.inaequal | : QI | IK | ET | LR | MH | SP | I   | HS | I     | RA    | VK  | Q     | P     | M     | VE    | G     | T     | P  | ----- | : 387 |       |       |       |
| V.nashicol | : QI | IK | ET | LR | MH | SP | I   | HS | I     | RA    | VK  | Q     | P     | M     | PI    | E     | G     | T  | P     | ----- | : 388 |       |       |
| N.fischi-B | : KV | IK | ET | LR | LH | AP | I   | HS | I     | RA    | V   | KN    | P     | MA    | V     | D     | G     | T  | S     | ----- | : 390 |       |       |
| A.lentul-B | : KV | IK | ET | LR | LH | AP | I   | HS | I     | RA    | V   | KN    | P     | M     | V     | D     | G     | T  | S     | ----- | : 390 |       |       |
| A.fumiga-B | : KV | IK | ET | LR | LH | AP | I   | HS | I     | RA    | V   | KN    | P     | MA    | V     | D     | G     | T  | S     | ----- | : 390 |       |       |
| A.clavat-B | : KV | IK | ET | LR | LH | AP | I   | HS | I     | RA    | V   | KN    | P     | M     | P     | VE    | G     | T  | P     | ----- | : 390 |       |       |
| A.flavus-B | : KV | IK | ET | LR | I  | H  | AP  | I  | HS    | I     | RA  | V     | KN    | P     | M     | P     | VE    | G  | T     | P     | ----- | : 288 |       |
| A.oryzae   | : KV | IK | ET | LR | I  | H  | AP  | I  | HS    | I     | RA  | V     | KN    | P     | M     | P     | VE    | G  | T     | P     | ----- | : 390 |       |
| A.terreus  | : KV | IK | ET | LR | I  | H  | AP  | I  | HS    | I     | M   | RA    | V     | KN    | P     | M     | P     | VE | G     | T     | P     | ----- | : 390 |
| A.niger-B  | : KV | IK | ET | LR | I  | H  | AP  | I  | HS    | I     | RA  | V     | KN    | P     | M     | P     | V     | D  | G     | T     | P     | ----- | : 390 |
| A.niger-C  | : KV | IK | ET | LR | I  | H  | AP  | I  | HS    | I     | RA  | V     | KN    | P     | M     | P     | V     | D  | G     | T     | P     | ----- | : 390 |
| C.posadasi | : NV | IK | ET | LR | LH | AP | I   | HS | I     | RA    | V   | K     | S     | P     | M     | P     | V     | D  | G     | T     | K     | ----- | : 390 |

T.tonsur-B : NVIKETLRLHAPIHSILRAVKSPMPVEGTN----- : 391  
Aj.capsu-B : HVIRETLRIHAPIHSILRAVKSPMPVDGTR----- : 390  
Aj.derma-B : HVIRETLRLHAPIHSILRAVKSPMPVDGTR----- : 390  
U.necator : NVLKEVLRRLHAPIHSIMRKVKNPMPVPGTK----- : 393  
B.graminis : NVLKEVLRRLHAPIHSILRKVKNPMPVPGTS----- : 391  
M.acuformi : NVLKEVLRRLHTPIHSIMRKVKTPMPVTGTK----- : 390  
M.yallunda : NVLKEVLRRLHTPIHSIMRKVKTPMPVAGTK----- : 390  
B.jaapii : NVLKEVLRRLHTPIHSIMRKVKSPMPVPGTK----- : 390  
B.fuckelia : NVLKETLRLHTPIHSIMRKVTTMPISGTK----- : 391  
B.calthae : NVLKETLRLHTPIHSIMRKVTTMPISGTK----- : 370  
M.fruticol : NILKETLRLHTPIHSIMRKVTTMPVSGTK----- : 391  
S.scleroti : NILKETLRIHTPIHSIMRKVTTMPISGTK----- : 331  
N.crassa : AIVKETLRLHAPIHSIMRAVKTPMPVPGTK----- : 389  
C.globosum : AVIKETLRLNAPIHSIMRAVKQMPVPGTK----- : 389  
P.anserina : AIVKETLRLHAPIHSIMRAVKSPMPVPGTK----- : 389  
F.verticil : AIIKETLRLHAPIHSIMRAVKSPMPVPGTK----- : 340  
F.gramin-B : AIVKETLRLHAPIHSIMRAVKSPMPVPGTK----- : 391  
O.sinens-B : AIVKETLRLHAPIHSIMRAVKQPMVPGTK----- : 393  
P.tritici : QVVKETLRIHAPIHSIMRKVKQPLVVDGTN----- : 390  
L.maculans : QVVKETLRIHAPIHSIMRRVKQPLVVDGTN----- : 389  
P.nodorum : QVVKETLRIHAPIHSIMRTVKSPIVVEGTN----- : 398  
M.graminic : QVVKETLCIHAPIHSILRKVKSPMPIEGTA----- : 394  
F.lancelet : QVVKETLRIHAPIHSILRKVKSPMPIEGTA----- : 398  
P.digitatu : NVIKETLRLHSSIHTLMRKVKNPMPVPGTD----- : 388  
P.italicum : NVIKETLRLHSSIHTLMRKVKNPMPVPGTD----- : 387  
N.fische-A : HVVRETLLRHSSIHSLMRKVKSPPLVPGTP----- : 381  
A.lentul-A : QVVRETLLRHSSIHSLMRKVKSPPLVPGTP----- : 381  
A.fumiga-A : HVIRETLRIHSSIHSLMRKVKSPPLVPGTP----- : 381  
A.clavat-A : HVIRETLRLHSSIHSLMRKVKNTLSVPGTS----- : 381  
A.flavus-A : NLIKETLRLHLSIHSLMRKVKNPMPVPGTP----- : 375  
A.niger-A : SVIKETLRIHSSIHSLMRKVKNPMPVPGTS----- : 375  
Aj.capsu-A : NVIKETLRLHTSIHSLLRKVMNPMPVAGTP----- : 382  
Aj.derma-A : NVIKETLRLHTSIHSLLRKVKNPMPVAGTP----- : 382  
T.tonsur-A : NVIRETLRLNSSIHSLMRKVKNPMPVPGTS----- : 381  
M.grisea : NVVKETLRLVHSSIHSLMRKVKRPMRIPGSD----- : 384  
O.sinens-A : NVIKETLRLVHSSIHSLMRKVMRPMQVPNSD----- : 386  
F.gramin-A : NVVKETLRLVHSSIHSLMRKVKRPMQVPNSP----- : 376  
C.immitis : MVIKETLRLHAPIHSIMRKAKNTMAVPGTN----- : 379  
S.pombe : YVIQETLRLHPPHSHIMRKVKRDLVPGSK----- : 370  
P.carinii : YVIKETLRLHPPHSLIRKVKSPILIENTSP----- : 384  
C.albicans : NTIKETLRMHMPLHSIFRKVTNPLRIPETN----- : 393  
C.dublinie : NTIKETLRMHMPLHSIFRKVKNPPLRIPETN----- : 393  
C.tropical : NTIKETLRMHMPLHSIFRKVMNPLRVPNTK----- : 393  
L.elongisp : NTIKETLRMHMPLHSIFRKVMSPMPVPGTT----- : 393  
D.hansenii : NIIKETLRMHMPLHSIFRKVKNPPLVPNTQ----- : 393  
P.farinosa : NVIKETLRMHMPLHSIFRKVKKPLLVPGTK----- : 392  
P.stipitis : NVIKETLRLHMPHLSIFRKVSKSLLVPNTN----- : 394  
C.krusei : ATIKETLRLHMPHLSIFRKVTRDLPVPNTS----- : 393  
C.glabrata : QMIKETLRLHHPHLSIFRKVMRDVAIPNTS----- : 398  
N.delphens : QMIKETLRLHHPHLSIFRKVMRDVPIPNTS----- : 398  
S.cerevisi : QTIKETLRMHHPHLSIFRKVMKDMHPNTS----- : 397  
V.polyspor : QCIKETLRLHHPHLSIFRKVMKDMKVNTS----- : 396  
K.lactis : QTIKETLRLHHPHLSIFRKVMNDMPVPNSS----- : 398  
E.gossypii : QVIKETLRMHHPHLSIFRKVTRDMPVPNTS----- : 395  
Y.lipolyti : NTIKETLRLHMPHLSIFRQVMRDLPVPGTS----- : 387

C.cinerea : SVIRETLRMHPP IHSIMRYVRDDVAVPGSLSAPSK-----D : 421  
L.bicolor : TVIRETLRLHPP IHSIMRHVRDDVAVPATISAPSK-----D : 361  
P.chrysosp : SVIRETLRIHPP IHSIMRAVREDVVVPPTLAAPSE-----D : 408  
A.cinnamom : AVIRETLRMHTPIHSIMRQVRSDITVPPTLGAPSE-----D : 411  
C.neoforma : SIIRETLRMHAPIHSIYRKVLSDIPVPPSLSAPSE-----N : 409  
U.maydis : AVVKETLRLHPP LHSIMRYVKSDLAVPPTLSSPTSTKSEPD : 423  
M.globosa : AVIRETLRLHPP IHSIMRKVKSDMVVPPTLAAPISSKGSRD : 401  
C.elegans : AAIRETLRLHPP IFQMMRRVVADKIVYEKNG----- : 381  
chimpanzee : RCIKETLRLRPP IMIMMRMARTPQTVAG----- : 398  
macaca : RCIKETLRLRPP IMIMMRMARTPQTVAG----- : 398  
human : RCIKETLRLRPP IMIMMRMARTPQTVAG----- : 392  
orangutan : RCIKETLRLRPP IMIMMRMARTPQTVAG----- : 398  
pig : RCIKETLRLRPP IMTMMRMAKTPQTVAG----- : 392  
dog : RCIKETLRLRPP IMTMMRMAKTPQTIAG----- : 392  
horse : RCIKETLRLRPP IMTMMRLAKTPQTVAG----- : 392  
bull : RCIKETLRLRPP IMTMMRLAKTPLTVAG----- : 391  
sheep : RCIKETLRLRPP IMTMMRLAKTPQTVAG----- : 393  
rat : RCIKETLRLRPP IMTMMRMAKTPQTVAG----- : 392  
mouse : RCIKETLRLRPP IMTMMRMAKTPQTVAG----- : 375  
opossum : RCLKETLRLRPP IMTMMRLAKTPQMVGAG----- : 357  
chicken : RCLKETLRLRPP IMTMMRLAKTPQTVAG----- : 384  
finch : RCLKETLRLRPP IMTMMRMARTPQSVAG----- : 311  
killifish : RCLKETLRLRPP IMTMMRMARTPQTAAG----- : 388  
s.major : RCLKETLRLRPP IMTMMRMARSPQXAAG----- : 386  
salmon : RCLKETLRLRPP IMTMMRMARSPQTAAG----- : 334  
medaka : RCLKETLRLRPP IMTMMRMARTPQTAAG----- : 331  
frog : RCIKETLRLRPP IMTMMRMARTPQSVAG----- : 388  
X.tropical : RCIKETLRLRPP IMTMMRMARTPQSVAG----- : 388  
zebrafish : RCLKETLRLRPP IMTMMRMAKTPQKVGE----- : 384  
P.promelas : RCLKETLRLRPP IMTMMRMARTPQRVGE----- : 384  
catfish : RCLKETLRLRPP IMTMMRMARTPQKVGD----- : 315  
sea\_urchin : HCVKEALRLRPP IMTMMRVAKSPLTYKD----- : 382  
T.adhaeren : RTLKETLRLRPP IMTMMRMAKTPQKVKG----- : 334  
M.brevicol : ACIRETLRLRPP IMSIMRRAREDYKVTVNGVE----- : 399  
M.ovata : AAIRETLRLRPP LLTLMRNCRPMEVKVGEKT----- : 393  
T.br.bruce : RCARESIRRDPP LLMLMRKVMADVKGVS----- : 371  
T.br.gambi : RCARESIRRDPP LLMLMRKVMADVKGVS----- : 371  
T.congolen : RCARESIRRDPP LLMLMRKVMSDVKGVP----- : 371  
T.vivax : RCARESIRRDPP LIMLMRKVLADVKGVS----- : 371  
T.cruzi : RCVRESIRRDPP LLVMRMVKAEVKGVS----- : 371  
L.infantum : QCARESIRRDPP LVMLMRKVLKPQVVGK----- : 370  
L.amazonen : QCARESIRRDPP LVMLMRKVLKPQVVGK----- : 370  
L.major : QCARESIRRDPP LIMLMRKVLKPQVVGK----- : 370  
L.brazilie : KCARESIRRDPP LVMLMRKVLKPQVVGK----- : 370

## Supplemental Figure 2. Amino acid sequence alignment of human and dog CYP51

```

                *           20           *           40           *           60
human : MLLLGLLQAGGSVLGQAMEKVTGGNLLSMLLIACAFTLSLVYLIRLAAGHLVQLPAGVKSPPY : 63
dog : MLLLGLLQAGGSVLGQAMERVTGGNLLSMLLIACAFTLGLVYLIRLAVGHLAPLPAGAKSPPY : 63
      MLLLGLLQAGGSVLGQAME4VTGGNLLSMLLIACAFTL LVYLIRLA GHL LPAG KSPPY

                *           80           *           100           *           120
human : IFSPIPFLGHAIAFGKSPIEFLENAYEKYGPVFSFTMVGKTFITYLLGSDAAALLFNSKNEDLN : 126
dog : IFSPIPFLGHAIAFGKSPIEFLENAYEKYGPVFSFTMVGKTFITYLLGSDAAALLFNSKNEDLN : 126
      IFSPIPFLGHAIAFGKSPIEFLENAYEKYGPVFSFTMVGKTFITYLLGSDAAALLFNSKNEDLN

                *           140           *           160           *           180
human : AEDVYSRLTTPVFGKGVAYDVPNPVFLEQKMKLKSGLNIAHFQHVSIIEKETKEYFESWGES : 189
dog : AEDVYSRLTTPVFGKGVAYDVPNPVFLEQKMKLKSGLNIAHFQHVSIIEKETKEYFQSWGES : 189
      AEDVYSRLTTPVFGKGVAYDVPNPVFLEQKMKLKSGLNIAHF4QHVSIIEKETKEYF2SWGES

                *           200           *           220           *           240           *
human : GEKNVFEALSELIILTASHCLHGKEIRSQ LNEKVAQLYADLDGGF SHAAWLLPGWLP LPSFRR : 252
dog : GEKNLFEALSELIILTASHCLHGKEIRSQ LNEKVAQLYADLDGGF SHAAWLLPGWLP LPSFRR : 252
      GEKN6FEALSELIILTASHCLHGKEIRSQ LNEKVAQLYADLDGGF SHAAWLLPGWLP LPSFRR

                260           *           280           *           300           *
human : RDRAHREIKDIFYKAIQKRRQS QEKIDDILQ TLLDASTYK DGRPLTDDEVAGMLIGLLLAGQHT : 315
dog : RDRAHREIKNIFYKAIQKRRQSE EKIDDILQ TLLDASTYK DGRPLTDDEVAGMLIGLLLAGQHT : 315
      RDRAHREIK1IFYKAIQKRRQS2EKIDDILQ TLLD TYK DGRPLTDDEVAGMLIGLLLAGQHT

                320           *           340           *           360           *           3
human : SSTTSAWMGFFLARDKTLQK KCYLEQKTVC GENLPPLTYDQLKDLNLLDRCIKETLRLRPPIM : 378
dog : SSTTSAWMGFFLARDITLQDKCYLEQKTVC GEDLPPLTYDQLKDLNLLDRCIKETLRLRPPIM : 378
      SSTTSAWMGFFLARD TLQ KCYLEQKTVCGE1LPPLTYDQLKDLNLLDRCIKETLRLRPPIM

                80           *           400           *           420           *           440
human : IMMRMARTPQTVAGYTIPP GHQVCV SPTVNQRLKDSWVERLDFNPDRYLQDNPASGEKFAYVP : 441
dog : TMMRMAKTPQTIAGYTIPP GHQVCV SPTVNQRLKDSWVERLDFNPDRYLQDNPASGEKFAYVP : 441
      MMRMA4TPQT6AGYTIPP GHQVCV SPTVNQRLKDSWVERLDFNPDRYLQDNPASGEKFAYVP

                *           460           *           480           *           500
human : FGAGRHCIGENFAYVQIKTIWSTMLRLYEFDLIDGYFPTVNYTTMIHTPENPVIRYKRRSK : 503
dog : FGAGRHCIGENFAYVQIKTIWSTMLRLYEFDLIDGYFPTVNYTTMIHTPENPVIRYKRRSK : 503
      FGAGRHCIGENFAYVQIKTIWSTMLRLYEFDLIDGYFPTVNYTTMIHTPENPVIRYKRRSK

```

**Supplemental Figure 3. Amino acid sequence alignment of *T. cruzi* Marinkellei-CYP51 and Y-CYP51A.**

```

Marinkelle : MFIEAILLGLTALILYSVYSVKSFNTRPTDPPVYPLTVPFLGHIVQFGKDPLCFMQRCKR : 61
Y-A        : MFIEAIVLGLTALILYSVYSVKSFNTRPTDPPVYPVTVPFLGHIVQFGKNPLCFMQRCKR : 61
           MFIEAI6LGLTALILYSVYSVKSFNTRPTDPPVYP6TVPFLGHIVQFGK1PL FMQRCKR

           *           80           *           100           *           120
Marinkelle : ELKSGVFTINIGGKRVTVIVGDPHEHSRFFSPRNEILSPREVYTIMTPVFGEGVAYSAPYPR : 122
Y-A        : DLKSGVFTISIGGQRVTVIVGDPHEHSRFFSPRNEILSPREVYTIMTPVFGEGVAYAAPYPR : 122
           LKSGVFTI IGG RVTIVGDPHEHSRFFSPRNEILSPREVYTIMTPVFGEGVAY APYPR

           *           140           *           160           *           180
Marinkelle : MREQLNFLAEELTIKQNFVPAIQHEVRKFMAENWNKDEGVINILEDGAMIINTACQCL : 183
Y-A        : MREQLNFLAEELTIKQNFVPAIQHEVRKFMAENWKEDEGVINLLEDGAMIINTACQCL : 183
           MREQLNFLAEELTI KQNFVPAIQHEVRKFMAENW DEGVIN6LEDGAMIINTACQCL

           *           200           *           220           *           240
Marinkelle : FGEDLRKRLNARIFAQLLSKMEGSLIPAAVFMFWLLRPLPQSARCREARAELQILGEII : 244
Y-A        : FGEDLRKRLNARIFAQLLSKMESSLIPAAVFMFWLLRPLPQSARCREARAELQKILGEII : 244
           FGEDLRKRLNAR FAQLLSKME SLIPAAVFMFWLLRPLPQSARCREARAELQ4ILGEII

           *           260           *           280           *           300
Marinkelle : IAREKEEASKDNNTSDLLGGLLKAVYRDGTRMSLHEVCGMIVAAMFAGQHTSTITTSWSML : 305
Y-A        : VAREKEEASKDNNTSDLLGGLLKAVYRDGTRMSLHEVCGMIVAAMFAGQHTSTITTSWSML : 305
           6AREKEEASKDNNTSDLLGGLLKAVYRDGTRMSLHEVCGMIVAAMFAGQHTSTITTSWSML

           *           320           *           340           *           360
Marinkelle : HLMHPKNKKYLDKFKYKEIDFPAQLNYDNVMDMPFIERCVRESIRRDPLLMVMRMVKAD : 366
Y-A        : HLMHPKNKKWLDKFKHKEIDFPAQLNYDNVMDMPFAERCVRRESIRRDPSLLMVMRMVKA : 366
           HLMHPKNKK5LDK KEIDFPAQLNYDNVMDMPF ERCVRESIRRDPLLMVMRMVKA

           *           380           *           400           *           420
Marinkelle : VKIGSYVVPKGDIIACSPLLSHHDEEAFPNRLWDPERDEKIDGAFIIFGAGVHKCIGQKF : 427
Y-A        : VKVGSYVVPKGDIIACSPLLSHHDEEAFPNRLWDPERDEKVDGAFIIFGAGVHKCIGQKF : 427
           VK6GSYVVPKGDIIACSPLLSHHDEEAFPNRLWDPERDEK6DGAFI FGAGVHKCIGQKF

           *           440           *           460           *           480
Marinkelle : ALLQVKTILATAFREYDFQLLRDEVPDPDYHTMVVGPTLNQCLVKYTRKKKLPS : 481
Y-A        : ALLQVKTILATAFREYDFQLLRDEVPDPDYHTMVVGPTLNQCLVKYTRKKKLPS : 481
           ALLQVKTILATAFREYDFQLLRDEVPDPDYHTMVVGPTLNQCLVKYTRKKKLPS

```
